# Supplementary figures and images for: A Comparative Analysis of a Self-Reported Adverse Events Analysis after Receiving One of the Available SARS-CoV-2 Vaccine Schemes in Ecuador
Source: MDPI journal article supplement (doi:10.3390/vaccines10071047), 2022-06-30

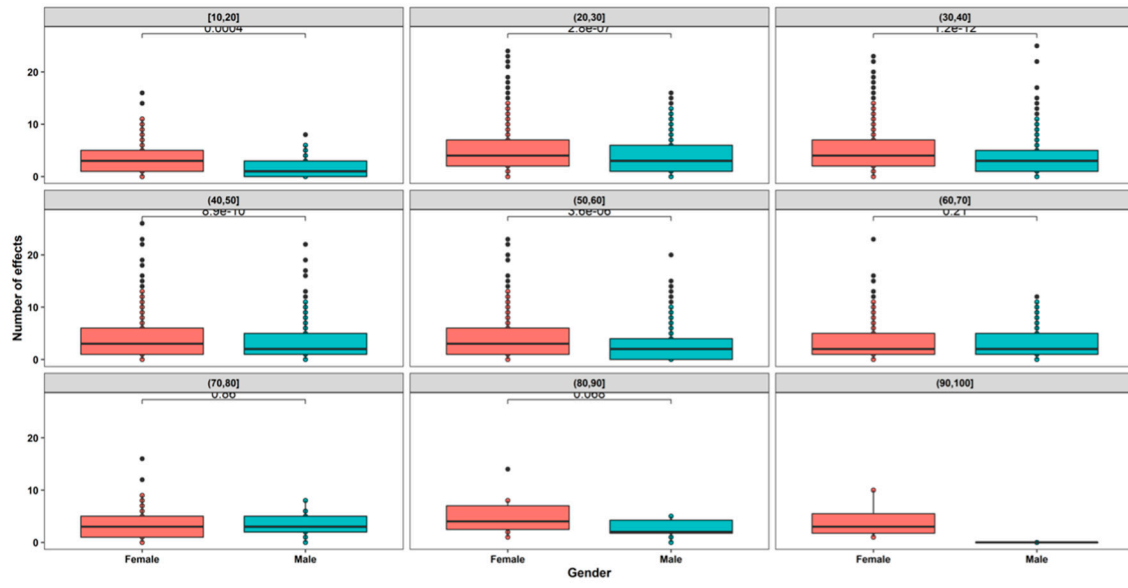

Supplement: s1 [file s1]
